# Supplementary material for: Clinical predictors of cybersickness in virtual reality (VR) among highly stressed people
Source: PubMed Central journal article supplement (PMC8190110; doi:10.1038/s41598-021-91573-w), 2021-06-09
Supplement: 41598_2021_91573_MOESM1_ESM.pdf [file 41598_2021_91573_MOESM1_ESM.pdf]

Supplementary Figure 1. Study design.

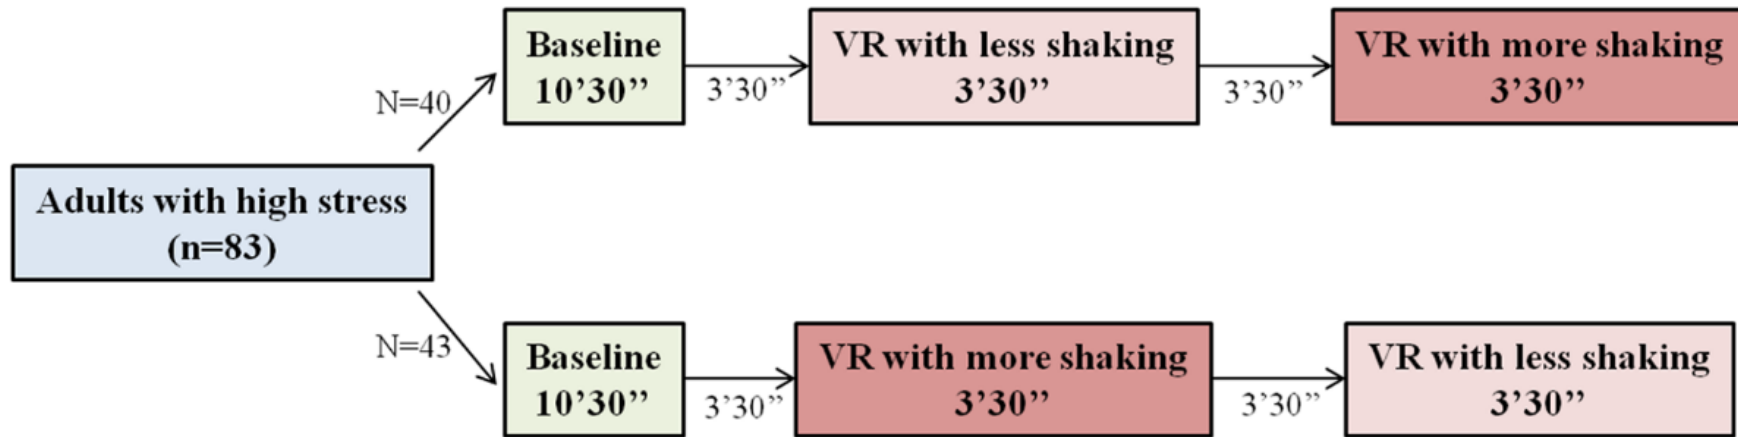

**Supplementary Table 1.** The responses of subjects to baseline SSQ

|                            | <b>0</b><br><b>(No symptom)</b> | <b>1</b><br><b>(Mild)</b> | <b>2</b><br><b>(Moderate)</b> | <b>3</b><br><b>(Severe)</b> |
|----------------------------|---------------------------------|---------------------------|-------------------------------|-----------------------------|
|                            | <b>N (%)</b>                    |                           |                               |                             |
| General discomfort         | 53 (63.9)                       | 25 (30.1)                 | 5 (6.0)                       | 0 (0)                       |
| Fatigue                    | 40 (48.2)                       | 35 (42.2)                 | 6 (7.2)                       | 2 (2.4)                     |
| Headache                   | 60 (72.3)                       | 21 (25.3)                 | 2 (2.4)                       | 0 (0)                       |
| Eyestrain                  | 38 (45.8)                       | 40 (48.2)                 | 5 (6.0)                       | 0 (0)                       |
| Difficulty focusing eyes   | 64 (77.1)                       | 17 (20.5)                 | 2 (2.4)                       | 0 (0)                       |
| Increased salivation       | 71 (85.5)                       | 11 (13.3)                 | 1 (1.2)                       | 0 (0)                       |
| Increased sweating         | 69 (83.1)                       | 11 (13.3)                 | 3 (3.6)                       | 0 (0)                       |
| Nausea                     | 63 (75.9)                       | 17 (20.5)                 | 3 (3.6)                       | 0 (0)                       |
| Difficulty concentrating   | 60 (72.3)                       | 21 (25.3)                 | 2 (2.4)                       | 0 (0)                       |
| Fullness of head           | 58 (69.9)                       | 20 (24.1)                 | 5 (6.0)                       | 0 (0)                       |
| Blurred vision             | 64 (77.1)                       | 19 (22.9)                 | 0 (0)                         | 0 (0)                       |
| Dizziness with eyes open   | 59 (71.1)                       | 22 (26.5)                 | 2 (2.4)                       | 0 (0)                       |
| Dizziness with eyes closed | 64 (77.1)                       | 18 (21.7)                 | 1 (1.2)                       | 0 (0)                       |
| Vertigo                    | 61 (73.5)                       | 18 (21.7)                 | 4 (4.8)                       | 0 (0)                       |
| Stomach awareness          | 67 (80.7)                       | 13 (15.7)                 | 3 (3.6)                       | 0 (0)                       |
| Burping                    | 76 (91.6)                       | 6 (7.2)                   | 1 (1.2)                       | 0 (0)                       |

SSQ, Simulator Sickness Questionnaire

**Supplementary Table 2.** Multivariable linear regression analysis.

|                             | SSQ                  |                |          |               | FMS                  |                |          |              |
|-----------------------------|----------------------|----------------|----------|---------------|----------------------|----------------|----------|--------------|
|                             | $\beta$ -coefficient | Standard error | <i>P</i> | 95% CI        | $\beta$ -coefficient | Standard error | <i>P</i> | 95% CI       |
| Sex                         | -5.05                | 11.61          | 0.665    | -28.26, 18.16 | 1.17                 | 1.20           | 0.331    | -1.22, 3.57  |
| Smoking                     | -34.47               | 12.74          | 0.009    | -59.94, -9.00 | -2.74                | 1.31           | 0.041    | -5.37, -0.11 |
| Age                         | -0.38                | 0.50           | 0.444    | -1.37, 0.61   | 0.09                 | 0.05           | 0.096    | -0.02, 0.19  |
| Baseline SSQ                | 0.01                 | 0.19           | 0.941    | -0.37, 0.40   | 0.01                 | 0.02           | 0.558    | -0.03, 0.05  |
| NRS                         | 0.45                 | 0.25           | 0.079    | -0.05, 0.95   | -0.03                | 0.03           | 0.335    | -0.08, 0.03  |
| PSS-10                      | -1.25                | 1.34           | 0.357    | -3.94, 1.44   | 0.27                 | 0.14           | 0.055    | -0.01, 0.55  |
| PANAS – positive affect     | 2.63                 | 0.87           | 0.004    | 0.89, 4.36    | 0.16                 | 0.09           | 0.074    | -0.02, 0.34  |
| PANAS – negative affect     | 0.62                 | 0.82           | 0.456    | -1.02, 2.26   | 0.07                 | 0.08           | 0.394    | -0.10, 0.24  |
| LF/HF                       | -0.58                | 2.43           | 0.813    | -5.44, 4.29   | -0.11                | 0.25           | 0.658    | -0.61, 0.39  |
| EKG IBI                     | 0.03                 | 0.03           | 0.364    | -0.03, 0.09   | 0.00                 | 0.00           | 0.391    | 0.00, 0.01   |
| Near point of accommodation | 2.24                 | 1.90           | 0.244    | -1.57, 6.04   | 0.14                 | 0.20           | 0.473    | -0.25, 0.53  |
| Near point of convergence   | -3.01                | 1.67           | 0.076    | -6.35, 0.32   | -0.31                | 0.17           | 0.081    | -0.65, 0.04  |
| Inter-blink interval        | -0.60                | 0.32           | 0.068    | -1.24, 0.05   | -0.05                | 0.03           | 0.168    | -0.11, 0.02  |

Explanatory variables with a p-value below 0.10 in correlation analyses were included in multivariate linear regression analyses

SSQ, Simulator Sickness Questionnaire; FMS, Fast Motion sickness Scale; CI, confidence interval; NRS, Numeric Rating Scale; PSS-10, Perceived Stress Scale; PANAS, Positive and Negative Affect Schedule; LF, low frequency band; HF, high frequency band; IBI, inter-beat interval.
